# Supplementary material
Source: Springer Nature journal article supplement (https://www.springermedizin.de/resource/supplementary/12962_2007_57_MOESM1_ESM.pdf/9572046)

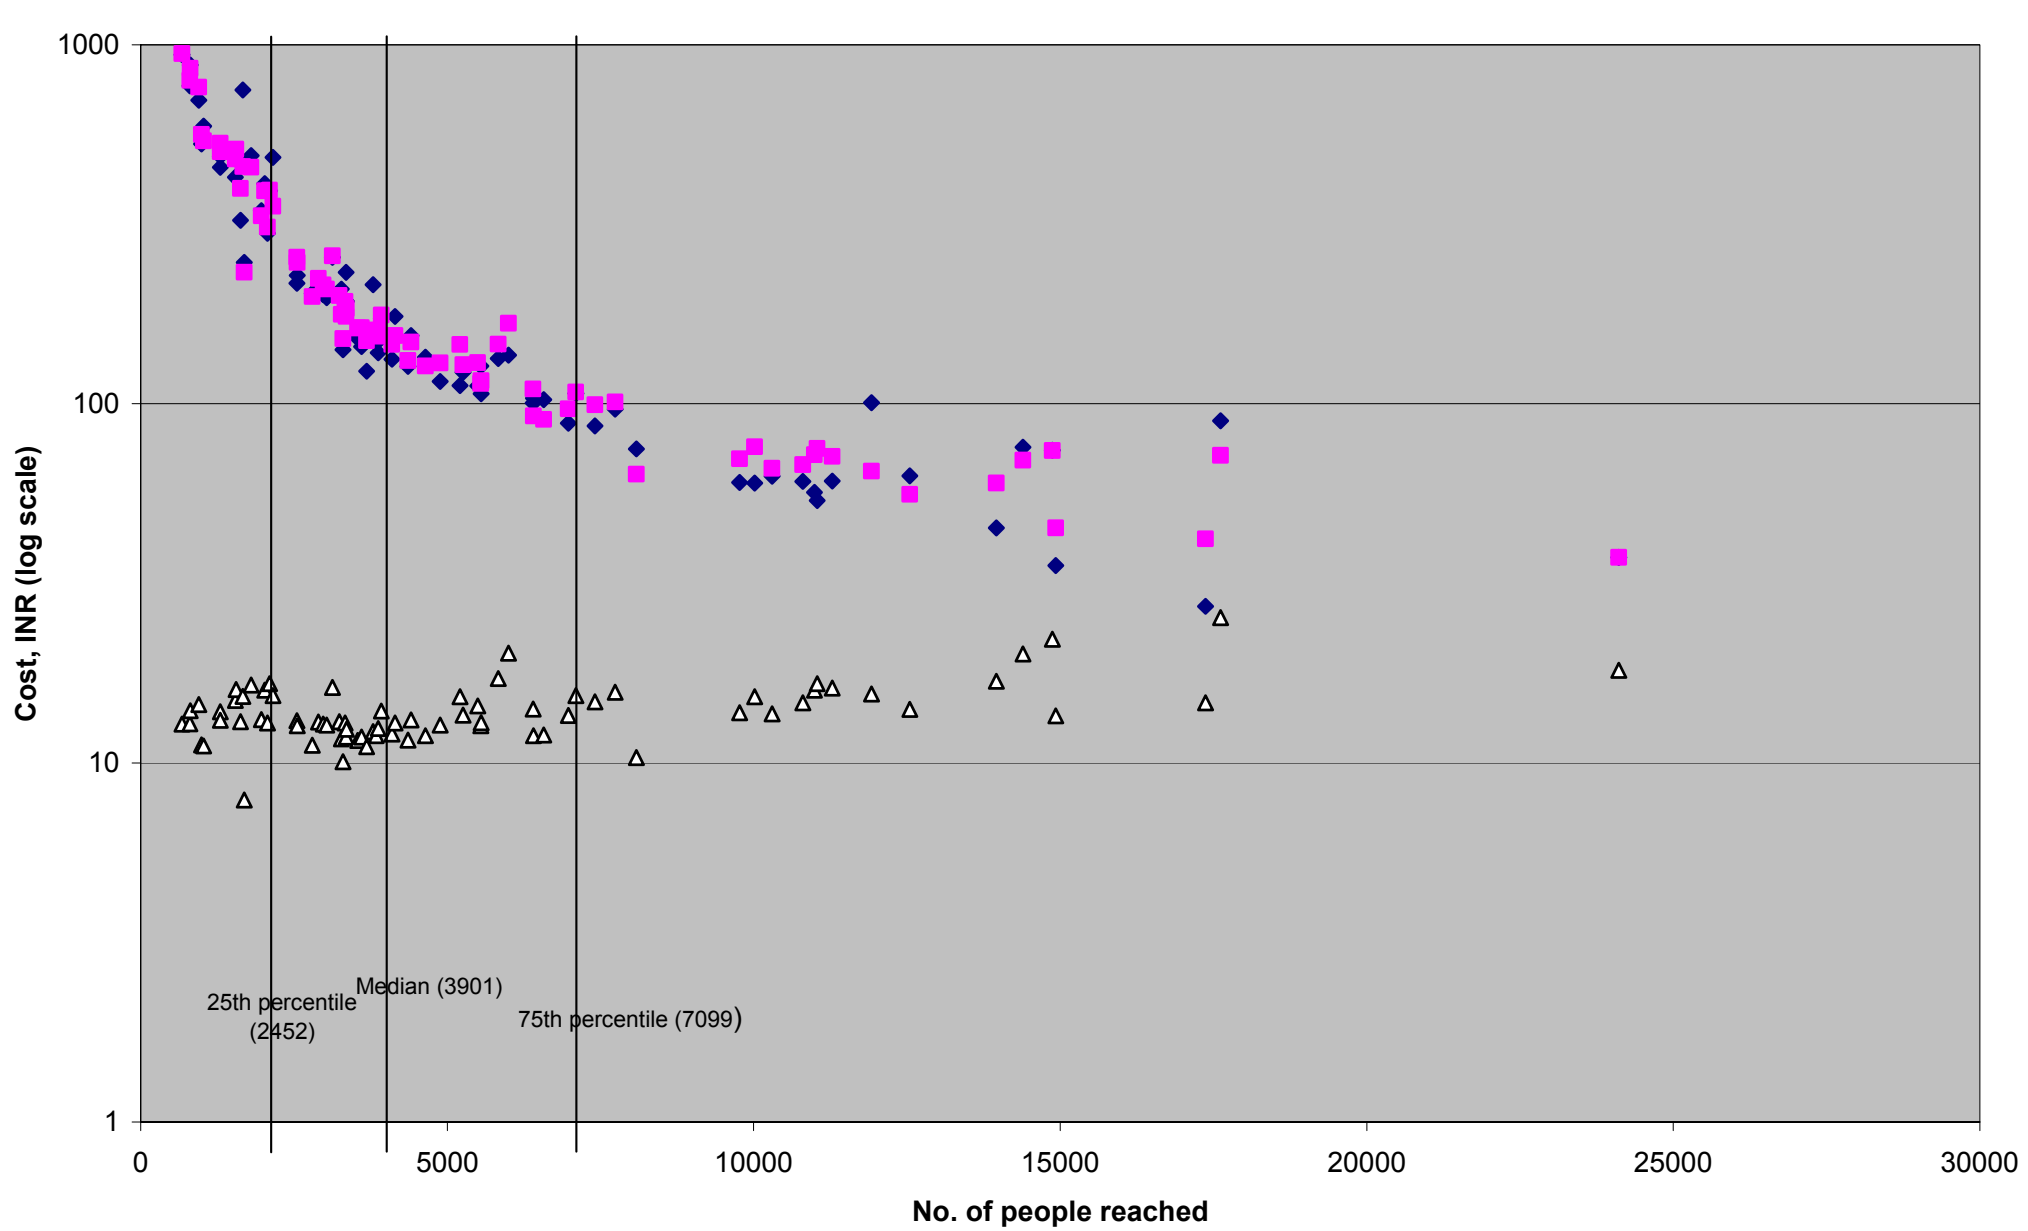

Supplement: MOESM1 [file 9572046]
